# Supplementary material for: Improving the lithium storage properties of Fe2O3@C nanoparticles by superoleophilic and superhydrophobic polysiloxane coatings
Source: Royal Society of Chemistry journal article supplement (doi:10.1039/c2jm31915b), 2012-01-01
Supplement: c2jm31915b.pdf [file c2jm31915b.pdf]

## Electronic Supplementary Information

### Effect of superoleophilic and superhydrophobic polysiloxane coating on the lithium storage properties of $\text{Fe}_2\text{O}_3@\text{C}$ nanoparticles

Qing Zhu, Ning Chen, Feng Tao, Qinmin Pan\*

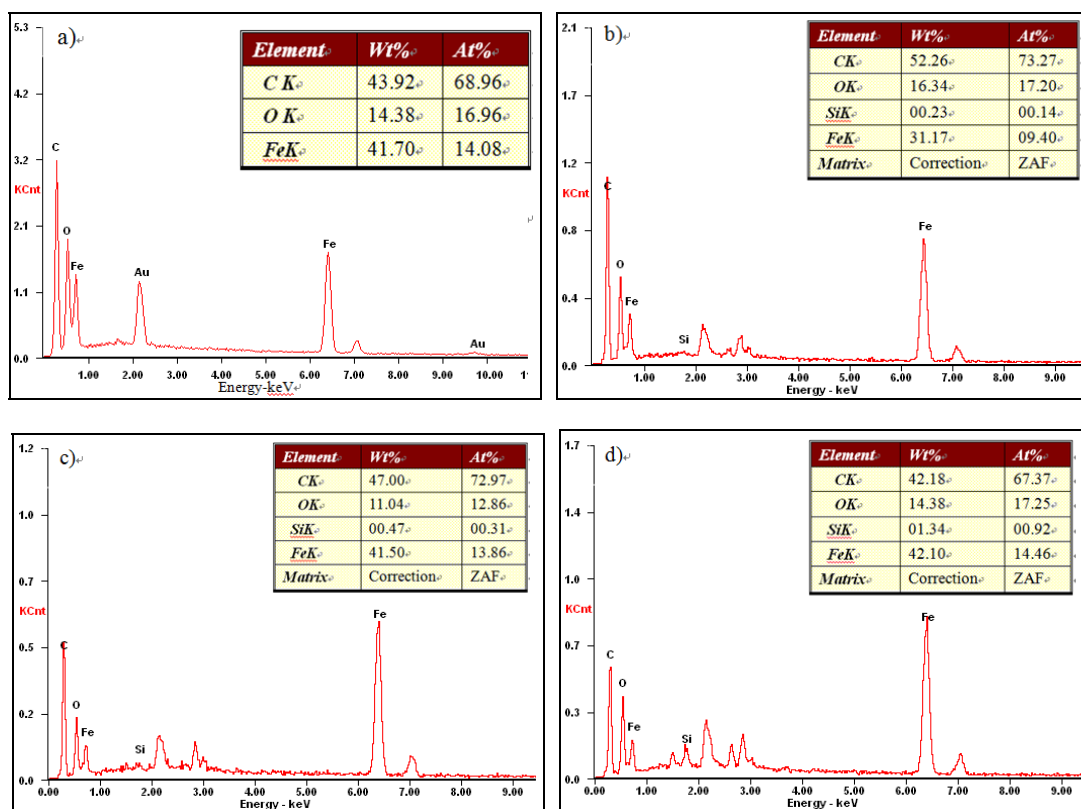

Figure S1. The EDX plots of the pristine (a), 0.5 mM methyltrichlorosilane (b), 1 mM methyltrichlorosilane (c) and 10 mM methyltrichlorosilane (d) treated  $\text{Fe}_2\text{O}_3@\text{C}$  nanoparticles.

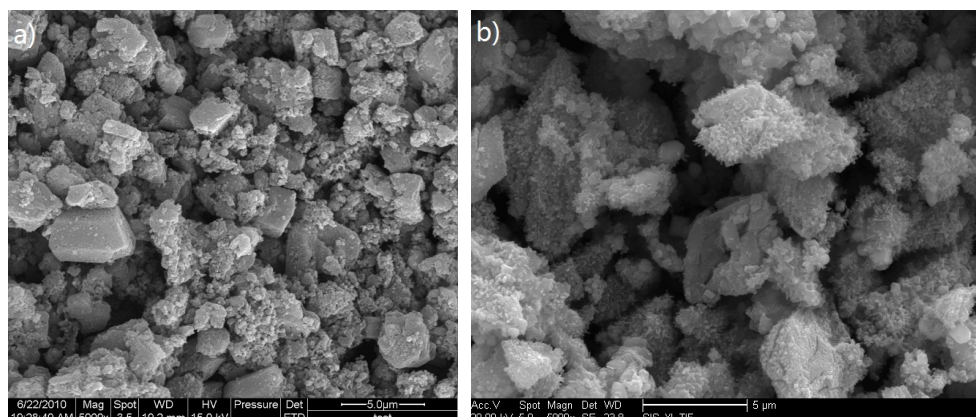

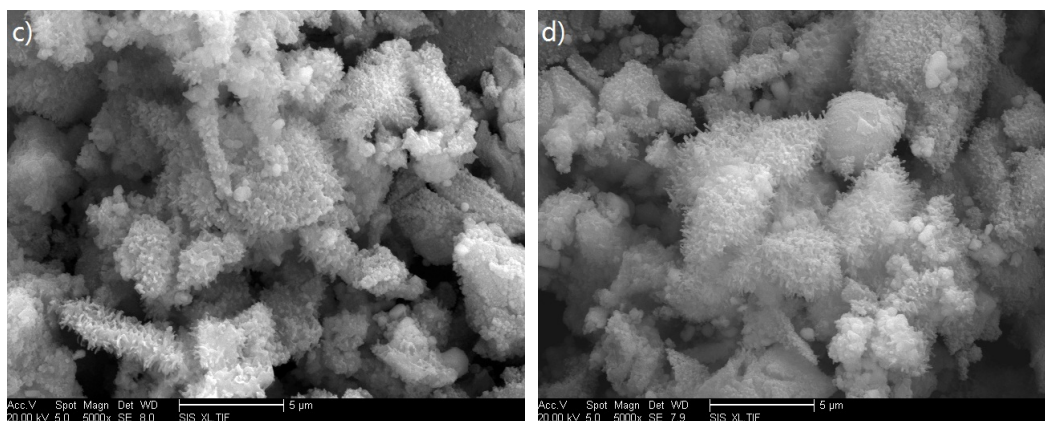

Figure S2. SEM images of the pristine (a) and 0.5 mM methyltrichlorosilane (b), 1 mM methyltrichlorosilane (c) and 10 mM methyltrichlorosilane (d) treated Fe<sub>2</sub>O<sub>3</sub>@C nanoparticles.

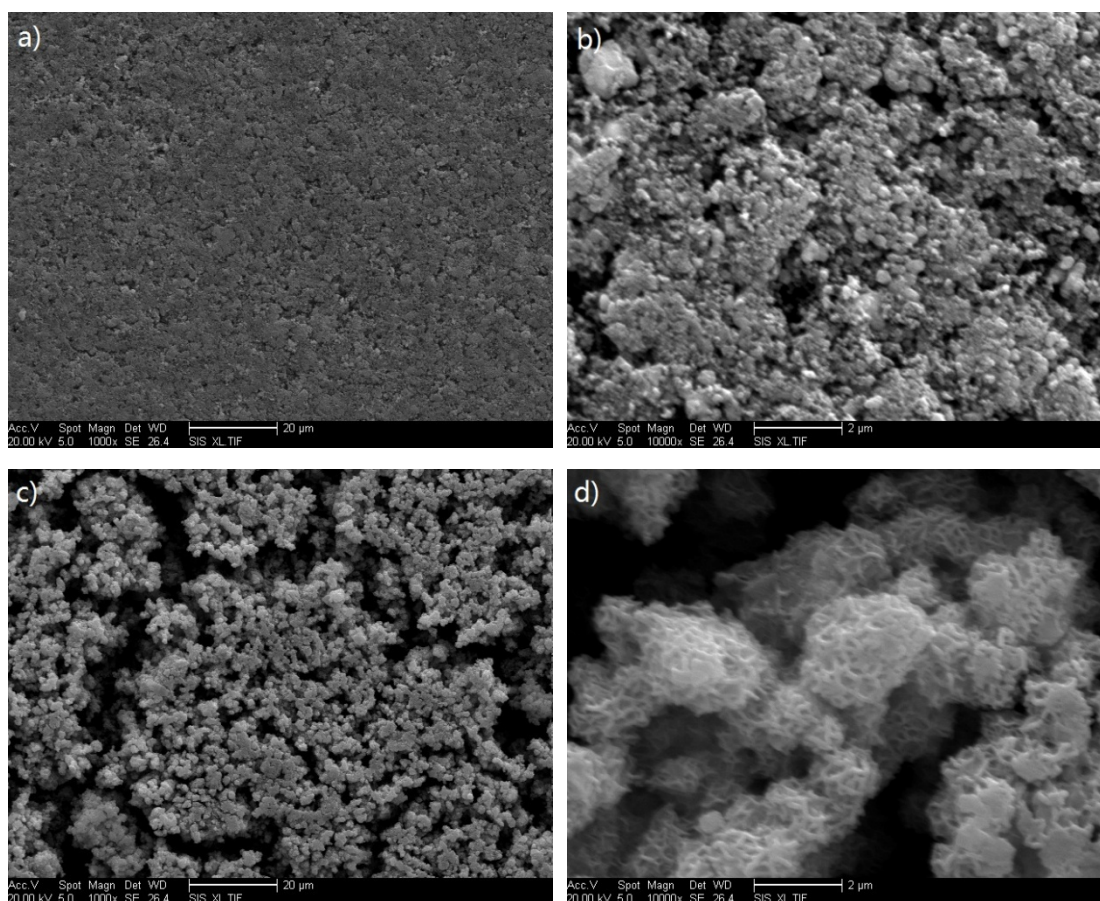

Figure S3. SEM images of the electrodes prepared from the pristine (a, b) and polysiloxane-coated (c, d) Fe<sub>2</sub>O<sub>3</sub>@C nanoparticles.

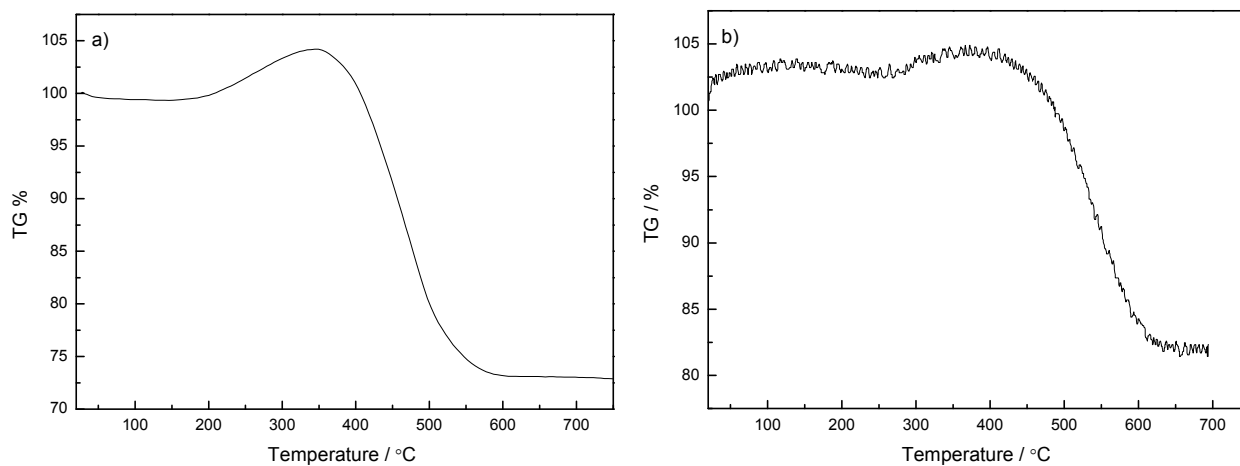

Figure S4. TGA curves of the pristine  $\text{Fe}_2\text{O}_3@\text{C}$  nanoparticles in air atmosphere (a) and polysiloxane-coated  $\text{Fe}_2\text{O}_3@\text{C}$  nanoparticles in argon atmosphere (b).

Table S1. Water contact angles and electrolyte wetting times for the electrodes prepared from the pristine and different concentrations methyltrichlorosilane treated  $\text{Fe}_2\text{O}_3@\text{C}$  nanoparticles.

|                                 | pristine         | 0.5 mM<br>methyltrichlorosilane | 1 mM<br>methyltrichlorosilane | 10 mM<br>methyltrichlorosilane |
|---------------------------------|------------------|---------------------------------|-------------------------------|--------------------------------|
| Water contact angle             | $143\pm 2^\circ$ | $153\pm 2^\circ$                | $172\pm 2^\circ$              | $152\pm 3^\circ$               |
| Wetting time to the electrolyte | 8 s              | 3 s                             | 1 s                           | 3 s                            |
